# Supplementary material for: Expert elicitation on the relative importance of possible SARS-CoV-2 transmission routes and the effectiveness of mitigations
Source: HighWire-hosted journal article supplement (doi:10.1136/bmjopen-2021-050869), 2021-12-01

Supplementary information 7: Elicitation round 2 responses: Pathway 5

In these figures the range presented to participants in round 2 (derived from round 1 responses) is shown in orange. The top graph shows each individuals' percentage estimates of the likelihood of the true value lying below, within and above the range. The middle graph shows an average of the individual distributions. The bottom graph shows that average distribution as a cumulative probability graph (blue) and the derived median and 95% confidence intervals in green.

Pathway 5

Participants' estimates of the percentage loss to the environment of infectious SARS-CoV-2 produced by an infected person in large, airborne droplets (>100 micrometres) before reaching a susceptible person's mucous membranes.

Mitigation 1: home-made face covering

Supplementary Figure 1: Participants' estimates of the percentage reduction of infectious virus carried in large (>100 micrometres) airborne particles caused by a susceptible person wearing a home-made cotton face covering

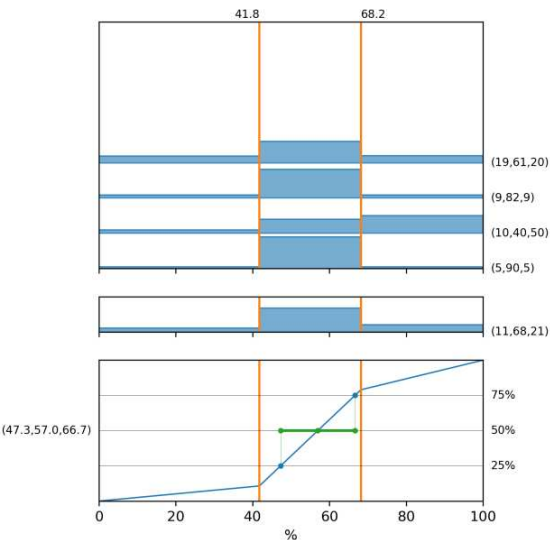

Mitigation 2: ‘surgical’ face mask

Supplementary Figure 2: Participants’ estimates of the percentage reduction of infectious virus carried in large (>100 micrometres) airborne particles caused by a susceptible person wearing a disposable ‘surgical’ face mask

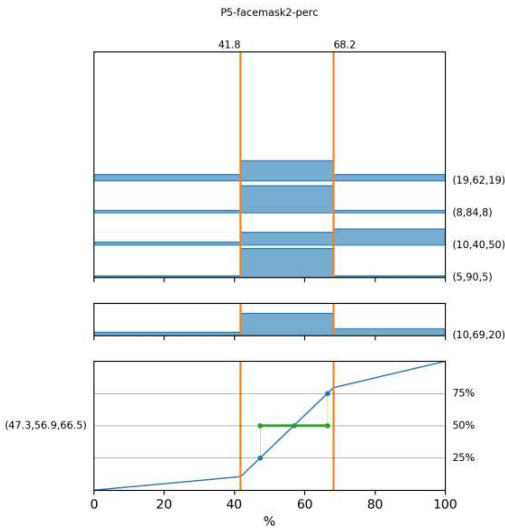

Mitigation 3: FFP3 or similar face mask

Supplementary Figure 3: Participants’ estimates of the percentage reduction of infectious virus carried in large (>100 micrometres) airborne particles caused by a susceptible person wearing a FFP3 or equivalent face mask

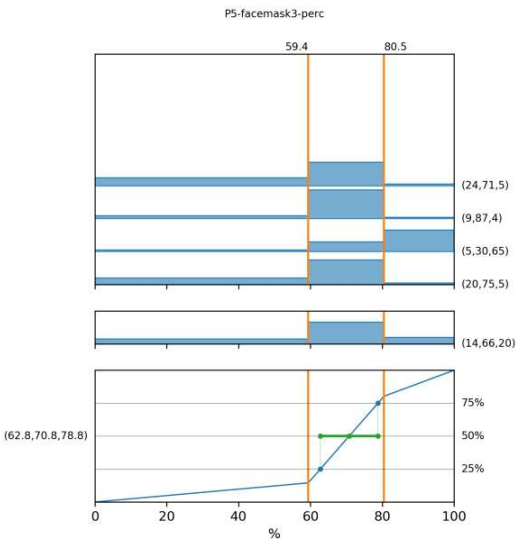

Mitigation 4: plastic face visor

Supplementary Figure 4: Participants’ estimates of the percentage reduction of infectious virus carried in large (>100 micrometres) airborne particles caused by a susceptible person wearing face visor. Because this variable was elicited first in Round 2, the blue plot shows individual participants’ estimated ranges, and the green plot is an average of those.

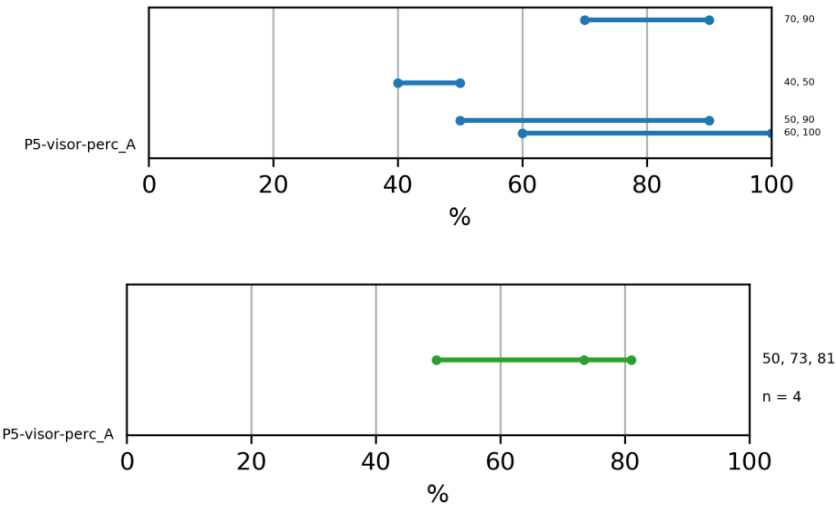

Mitigation 5: Perspex screen

Supplementary Figure 5: Participants’ estimates of the percentage reduction of infectious virus carried in large (>100 micrometres) airborne particles caused by a susceptible person being behind a Perspex screen

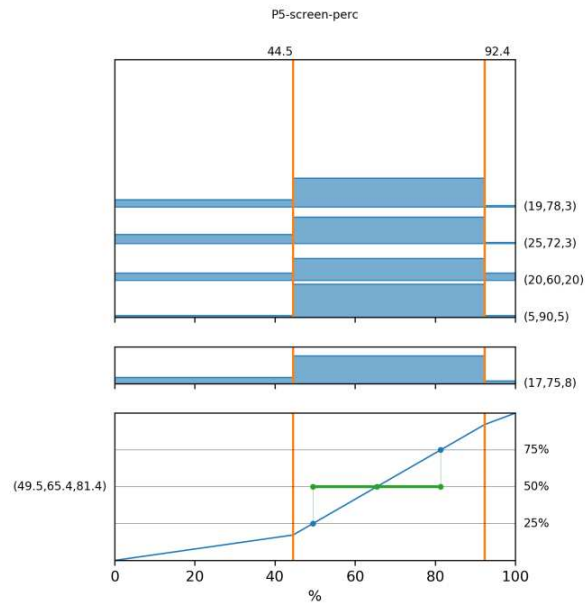

Supplement: bmjopen-2021-050869supp007_data_supplement.pdf [file bmjopen-2021-050869supp007_data_supplement.pdf]
